# Supplementary material for: Optical manipulation of animal behavior using a ruthenium-based phototrigger
Source: Royal Society of Chemistry journal article supplement (doi:10.1039/c8pp00467f), 2018-10-29
Supplement: c8pp00467f4.pdf [file c8pp00467f4.pdf]

## Optical Manipulation of Animal Behavior using a Ruthenium-based Phototrigger

Yeraldith Rojas Perez and Roberto Etchenique\*

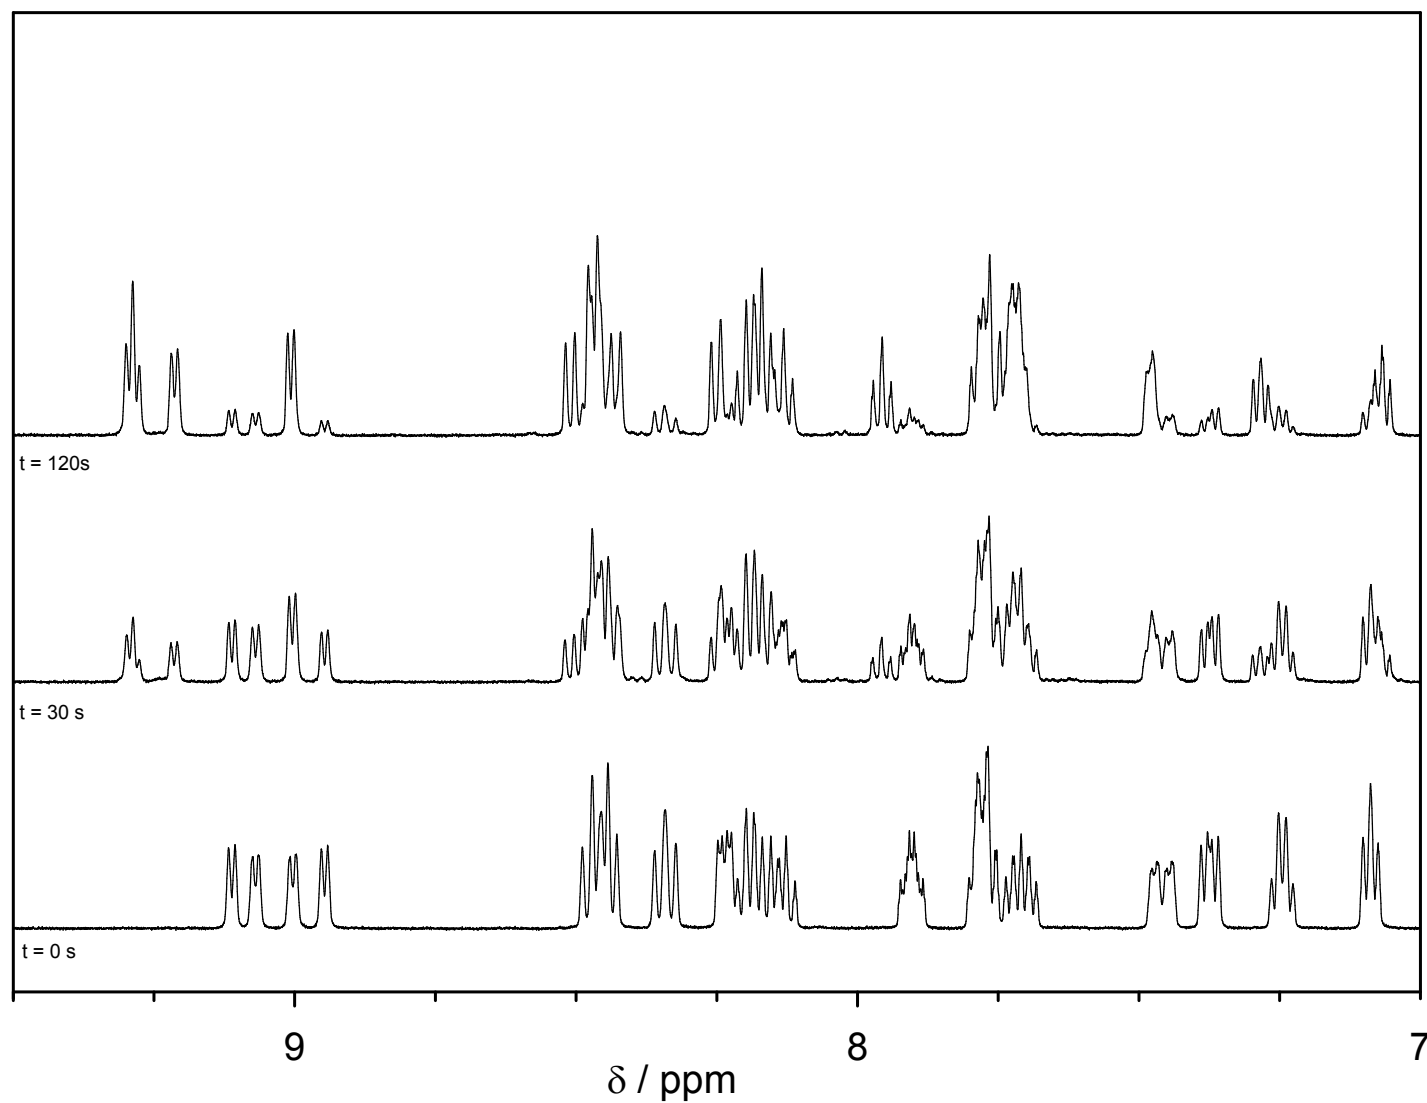

Figure ESI 1: Aromatic part of the  $^1\text{H}$ -NMR spectra of Rubi-Arg during direct photolysis inside the NMR tube with 532 nm light in a 5:1  $\text{D}_2\text{O}$ /Acetone- $\text{d}_6$ . The duplication of the initial 16 signals corresponding to the bipyridines corresponds to the fact that two diastereomers are present, since the racemic mixture of  $\Delta$ - $\Lambda$  Ru-bpy moiety reacts with the enantiomerically pure L-arginine.

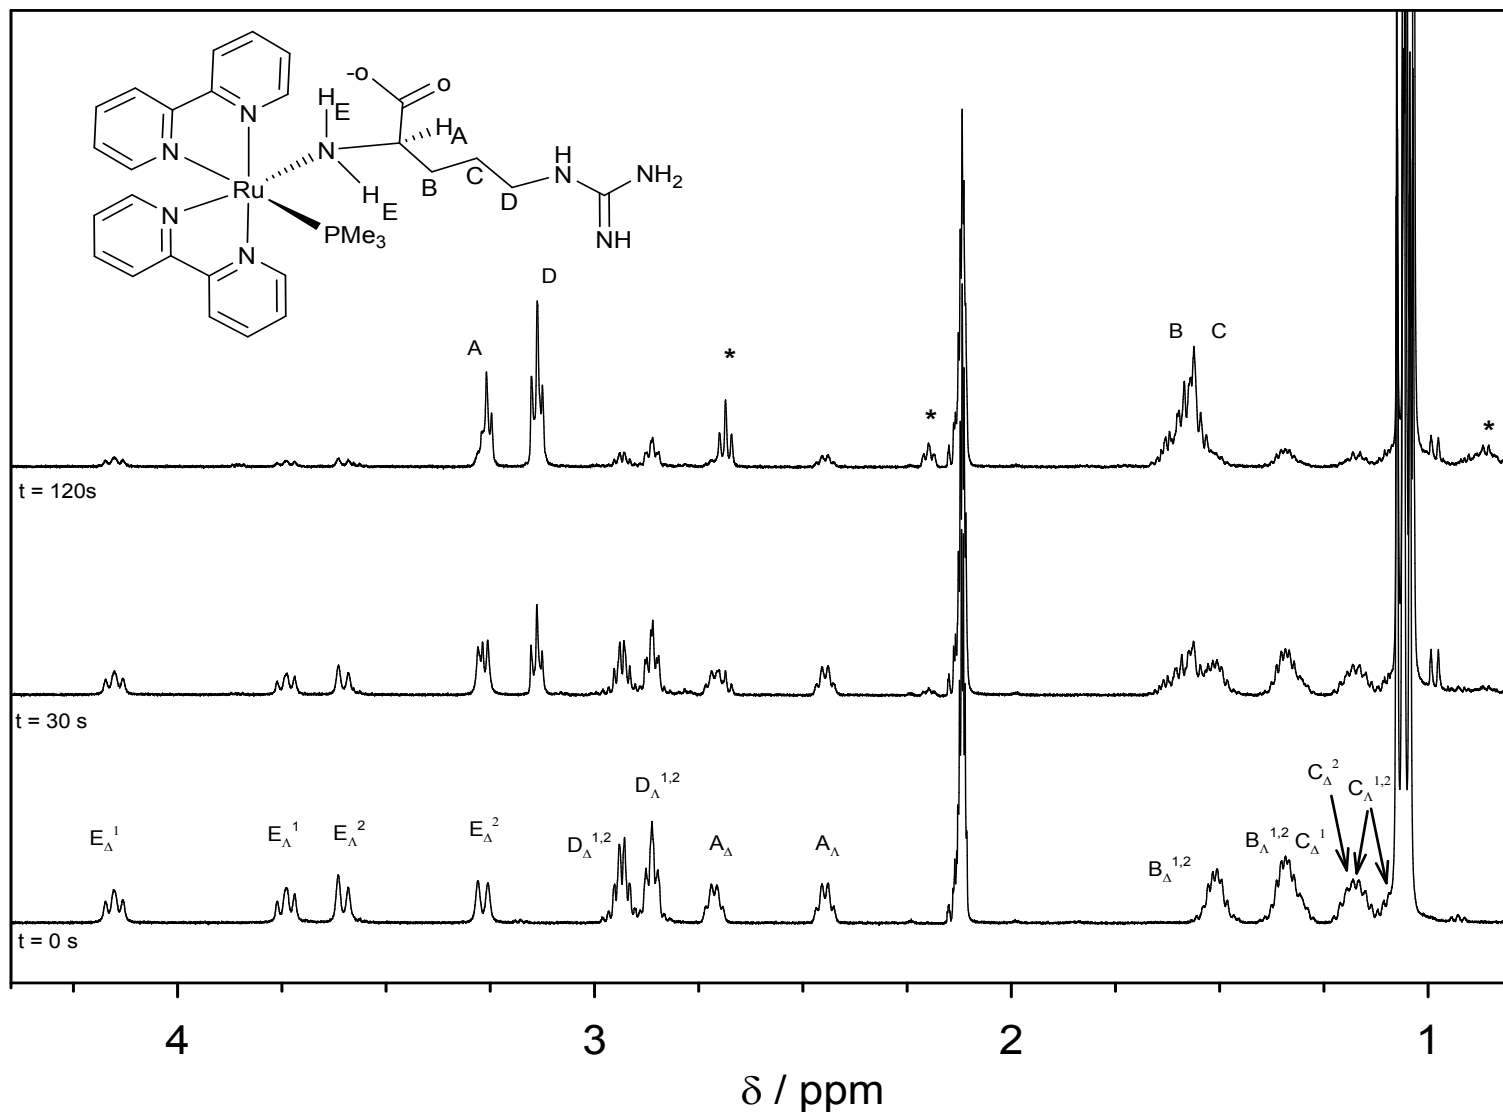

Figure ESI 2: Aliphatic part of the  $^1\text{H}$ -NMR spectra of Rubi-Arg during direct photolysis inside the NMR tube with 532 nm light in a 5:1  $\text{D}_2\text{O}$ /Acetone  $\text{d}_6$  and the assignment of the hydrogen signals. A, B, C, D corresponds to the free arginine. E is not seen in free arginine due to exchange with  $\text{D}_2\text{O}$ . At  $t = 0\text{ s}$  the signals for the coordinated arginine are shown. Superindexes 1 and 2 refers to the given hydrogen in a methylene, while  $\Delta$  and  $\Lambda$  subindexes indicates the Ru-bpy diastereomer to which L-Arg is bonded. Tall doublets around 1.05 corresponds to coordinated  $\text{PMe}_3$ . Signals at 2.69, 2.20 and 0.87 ppm (asterisks) correspond to the *trans*-Rubi-Arg produced during photolysis.

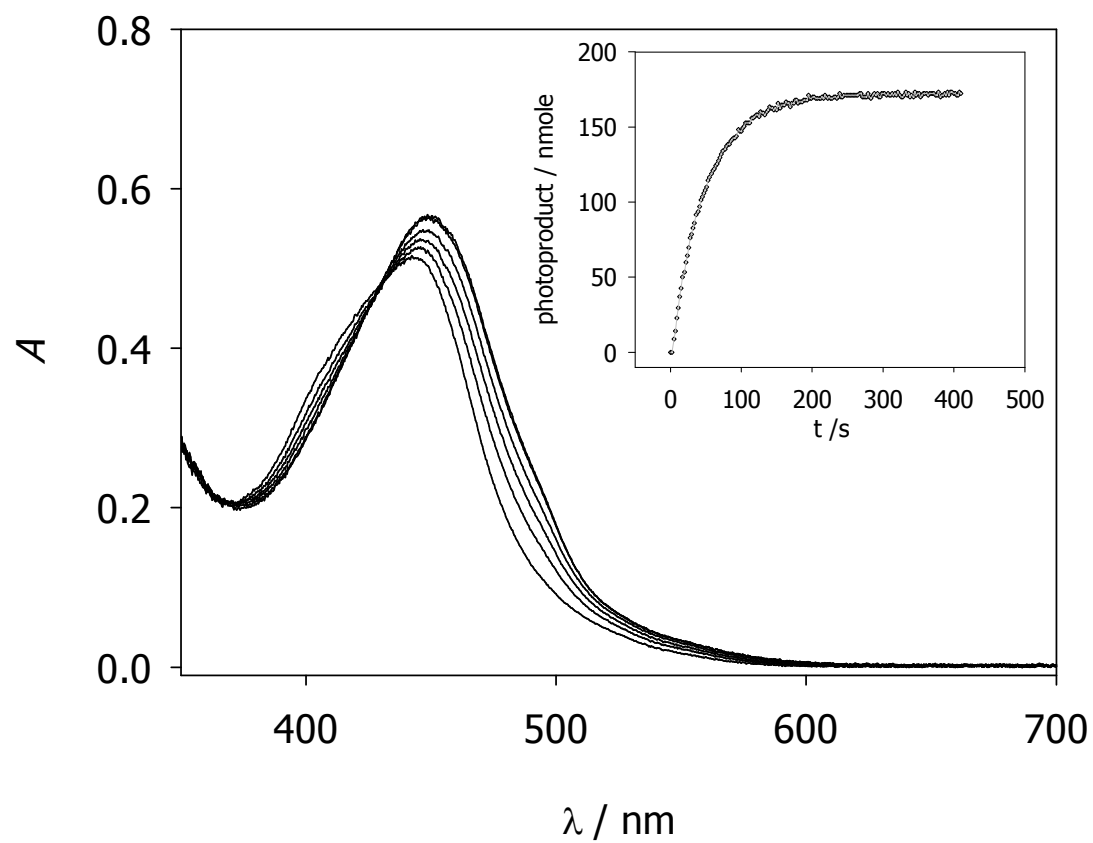

Figure ESI 3: UV-vis spectra of a solution 84  $\mu\text{M}$  RuBi-Arg during photolysis in  $\text{H}_2\text{O}$  ( $T=25^\circ\text{C}$ ,  $\text{pH}=7$ ,  $\lambda = 445 \text{ nm}$ ,  $p = 7.48 \text{ mW}$ ). Inset: moles of products vs. time. Solid line: fitting of Eq.1 for  $\phi_{PD} = 0.18$ .

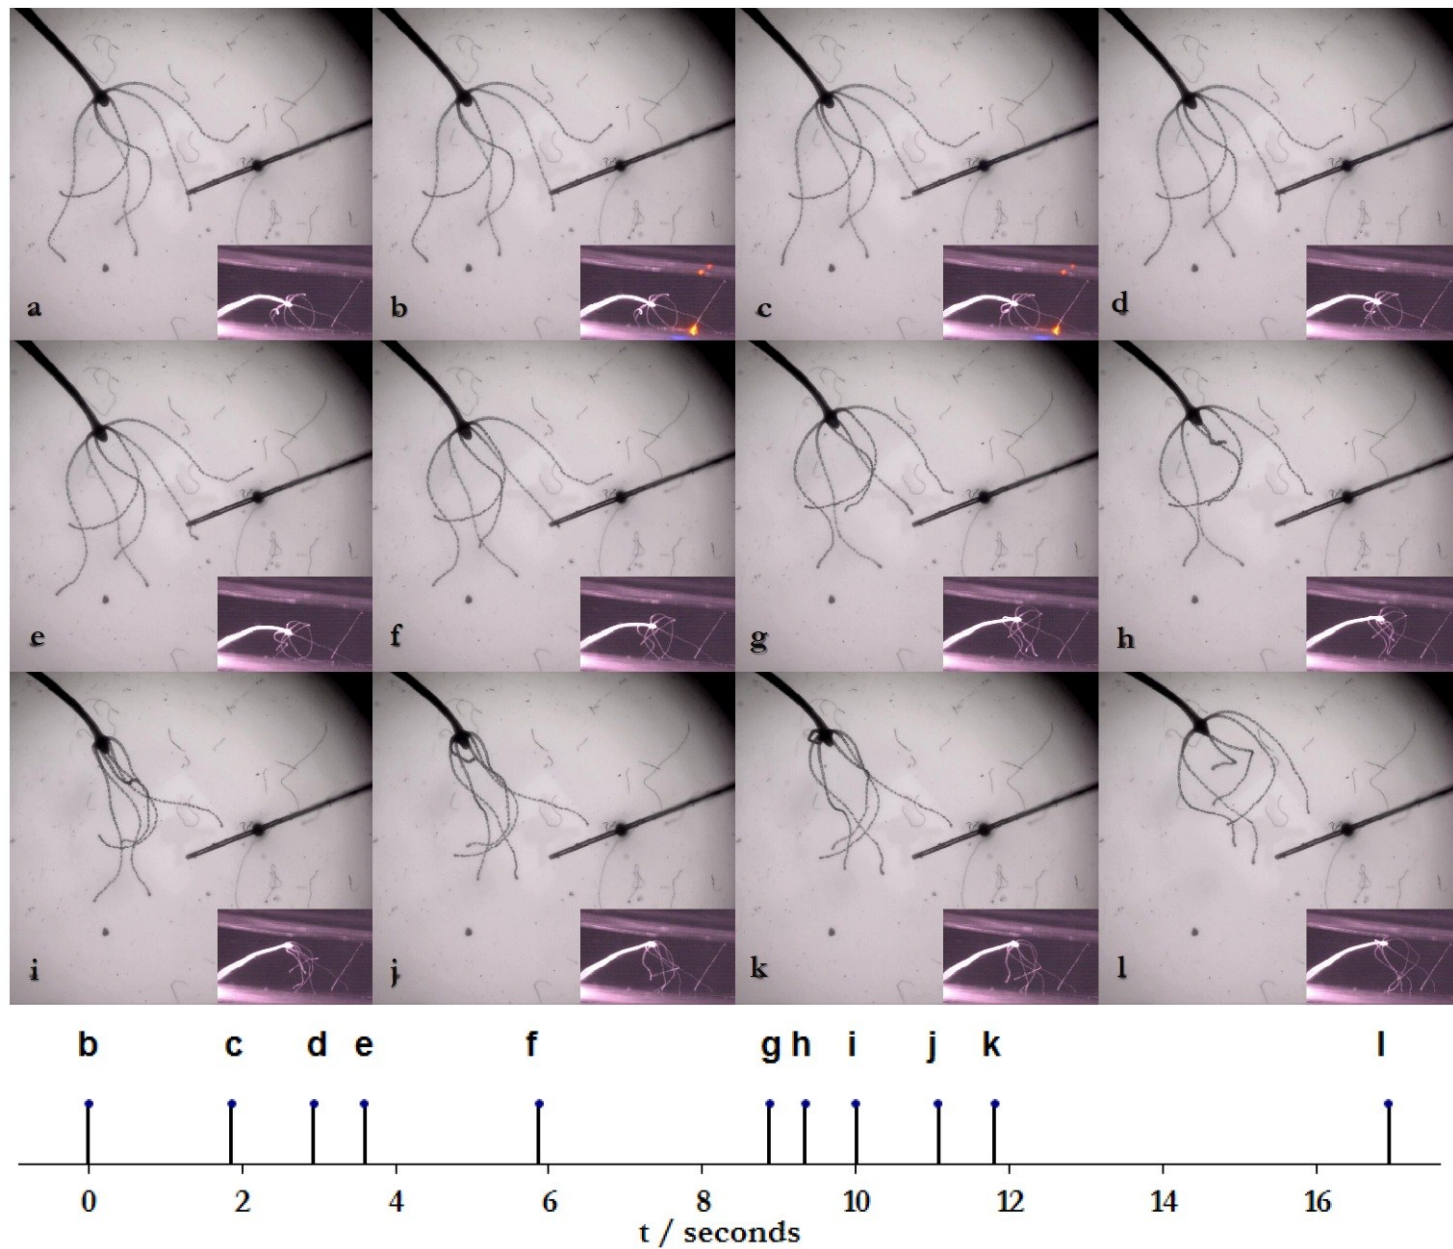

Figure ESI 4: Temporal sequence of elicited feeding response of Hydra by arginine uncaging. a) Before irradiation; b) (t=0) Laser ON; c) tentacle detects chemical ; d) (t=3s) Laser OFF; e,f) hook response; g,h) fast tentacle shrinkage; i-k) others tentacles help feeding; l) release. (This sequence corresponds to video hydra-arg.avi)

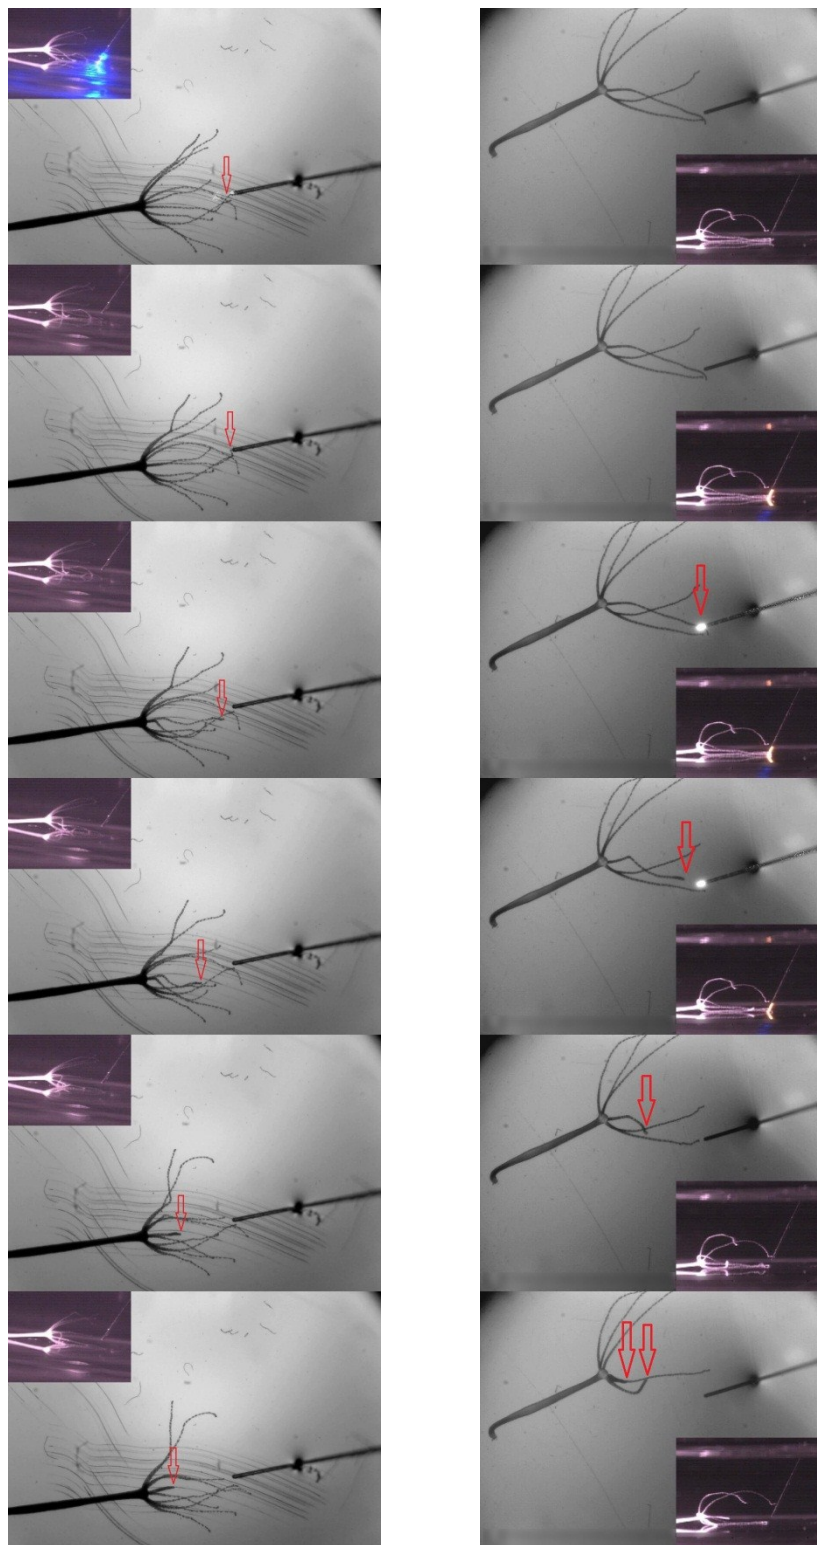

Figure ESI 5:  
Left panel:  
sequence of  
events

(feeding response) triggered by local photolysis of a 77  $\mu\text{M}$  solution of RuBi-Arg. Right panel: same experiment performed at 100  $\mu\text{M}$  RuBi-Arg.

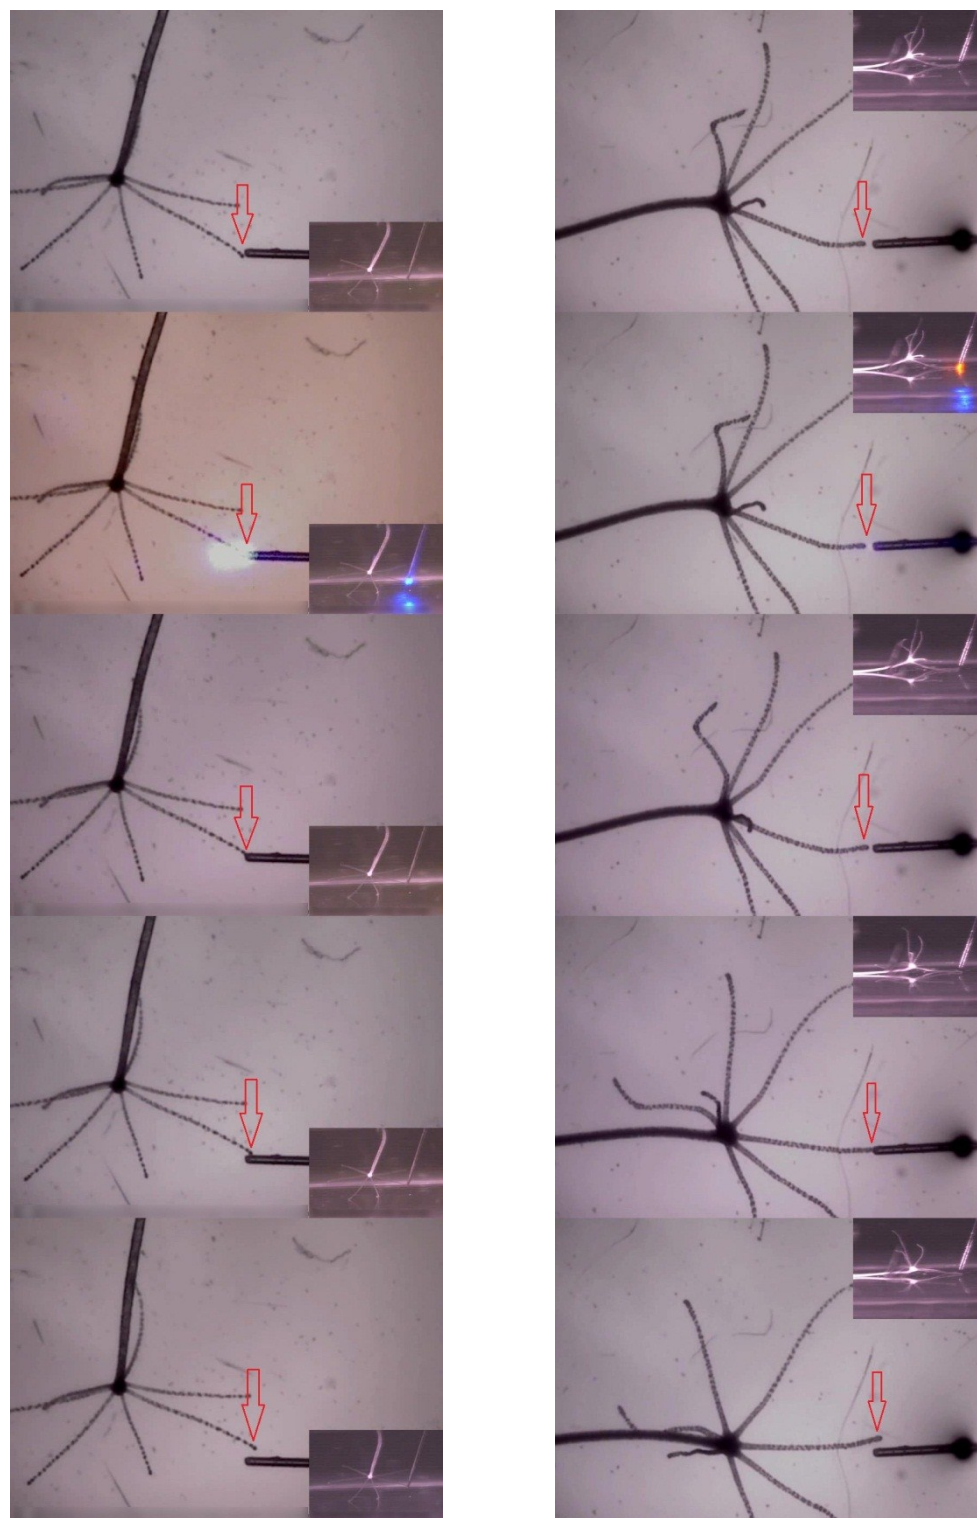

Figure ESI 6: Left panel: sequence of events (no response) after irradiation near a tentacle in a bath containing Hydra artificial freshwater solution. This sequence corresponds to the video Hydra-laser.avi. Right panel: Same experiment using a 1 mM  $[\text{Ru}(\text{bpy})_2\text{PMe}_3(\text{H}_2\text{O})]^{2+}$  solution, also showing no feeding response. This sequence corresponds to the video Hydra-aquo.avi.
